# Supplementary material for: Kinetics of fractionation by SO2–ethanol–water (SEW) treatment: understanding the deconstruction of spruce wood chips
Source: Royal Society of Chemistry journal article supplement (doi:10.1039/c2ra00957a), 2012-01-01
Supplement: c2ra00957a.pdf [file c2ra00957a.pdf]

**Electronic Supplementary Information**

Table S1. SEW fractionation of spruce chips.

| Initial<br>[SO <sub>2</sub> ]<br>in the<br>liquor,<br>% | Fractionation<br>duration,<br>min | Solid residue properties |                 |                        |        |       |                                           |                 | pH of<br>the<br>liquid<br>phase<br>(at<br>0°C) <sup>d</sup> |
|---------------------------------------------------------|-----------------------------------|--------------------------|-----------------|------------------------|--------|-------|-------------------------------------------|-----------------|-------------------------------------------------------------|
|                                                         |                                   | Yield,<br>% on<br>wood   | Kappa<br>number | Composition, % on wood |        |       | Intrinsic<br>viscosity<br>in CED,<br>mL/g | Cellulose<br>DP |                                                             |
|                                                         |                                   |                          |                 | Lignin                 | Mannan | Xylan |                                           |                 |                                                             |
|                                                         | Original wood                     | (100)                    | –               | 27.7                   | 12.8   | 5.31  | –                                         | –               | –                                                           |
| 3.0                                                     | 30                                | 80.2                     | n.d.            | 19.9                   | 7.13   | 3.20  | n.d.                                      | –               | 1.23                                                        |
|                                                         | 60                                | 68.7                     | n.d.            | 16.7                   | 5.13   | 2.72  | n.d.                                      | –               | 1.20                                                        |
|                                                         | 90                                | 62.1                     | n.d.            | 11.6                   | 4.27   | 2.34  | n.d.                                      | –               | 1.15                                                        |
|                                                         | 120                               | 61.5                     | n.d.            | 10.1                   | 3.98   | 2.24  | n.d.                                      | –               | 1.14                                                        |
|                                                         | 146                               | 55.0                     | 68.9            | 6.61                   | 3.31   | 1.68  | 1040 <sup>a</sup>                         | 5000            | 1.09                                                        |
|                                                         | 160                               | 56.0                     | 72.4            | 7.04                   | n.m.   | n.m.  | n.m.                                      | –               | n.m.                                                        |
|                                                         | 160                               | 54.2                     | 68.9            | 6.51                   | 2.98   | 1.59  | 1010 <sup>a</sup>                         | 4760            | 1.10                                                        |
|                                                         | 180                               | 52.6                     | 57.2            | 5.30                   | 2.78   | 1.54  | 936 <sup>a</sup>                          | 4240            | 1.06                                                        |
|                                                         | 200                               | 52.9                     | 58.8            | 5.47                   | n.m.   | n.m.  | n.m.                                      | –               | n.m.                                                        |
|                                                         | 220                               | 50.6                     | 47.2            | 4.26                   | 2.46   | 1.28  | 869 <sup>a</sup>                          | 3740            | 1.05                                                        |
|                                                         | 240                               | 50.5                     | 46.8            | 4.22                   | n.m.   | n.m.  | n.m.                                      | –               | n.m.                                                        |
|                                                         | 270                               | 48.4                     | 39.8            | 3.49                   | 2.28   | 1.18  | 774                                       | 3140            | 1.05                                                        |
|                                                         | 280                               | 50.1                     | 45.4            | 4.07                   | n.m.   | n.m.  | n.m.                                      | –               | n.m.                                                        |
|                                                         | 320                               | 47.5                     | 37.4            | 3.24                   | 1.95   | 0.99  | 628                                       | 2450            | 1.05                                                        |
| 370                                                     | 46.9                              | 32.6                     | 2.82            | 1.81                   | 0.91   | 586   | 2230                                      | 1.02            |                                                             |
| 6.0                                                     | 30                                | 76.8                     | n.d.            | 18.4                   | 5.98   | 2.87  | n.d.                                      | –               | 1.14                                                        |
|                                                         | 60                                | 63.8                     | n.d.            | 12.1                   | 4.50   | 2.43  | n.d.                                      | –               | 1.10                                                        |
|                                                         | 90                                | 55.5                     | 72.8            | 7.02                   | 3.79   | 1.89  | 1140 <sup>a</sup>                         | 5620            | 1.03                                                        |
|                                                         | 90 <sup>b</sup>                   | n.m.                     | 76.7            | –                      | n.m.   | n.m.  | n.m.                                      | –               | n.m.                                                        |
|                                                         | 100                               | 54.2                     | 58.1            | 5.54                   | 3.54   | 1.77  | 1100 <sup>a</sup>                         | 5260            | n.m.                                                        |
|                                                         | 120                               | 52.5                     | 44.0            | 4.15                   | 3.36   | 1.70  | 1050 <sup>a</sup>                         | 4820            | n.m.                                                        |
|                                                         | 120 <sup>b</sup>                  | n.m.                     | 49.4            | –                      | n.m.   | n.m.  | n.m.                                      | –               | n.m.                                                        |
|                                                         | 140                               | 49.9                     | 34.4            | 3.15                   | 2.97   | 1.49  | 937                                       | 4010            | 1.03                                                        |
|                                                         | 150 <sup>b</sup>                  | n.m.                     | 33.0            | –                      | n.m.   | n.m.  | n.m.                                      | –               | n.m.                                                        |
|                                                         | 170                               | 49.1                     | 22.4            | 2.13                   | 2.62   | 1.36  | 829                                       | 3440            | n.m.                                                        |
|                                                         | 180 <sup>b</sup>                  | n.m.                     | 21.2            | –                      | n.m.   | n.m.  | n.m.                                      | –               | n.m.                                                        |
|                                                         | 200                               | 46.8                     | 20.1            | 1.84                   | 2.24   | 1.20  | 758                                       | 2960            | 0.98                                                        |
|                                                         | 210 <sup>b</sup>                  | n.m.                     | 17.4            | –                      | n.m.   | n.m.  | n.m.                                      | –               | n.m.                                                        |
|                                                         | 240                               | 46.9                     | 19.0            | 1.77                   | 2.09   | 1.13  | 698                                       | 2700            | 1.01                                                        |
| 240 <sup>b</sup>                                        | n.m.                              | 15.0                     | –               | n.m.                   | n.m.   | n.m.  | –                                         | n.m.            |                                                             |
| 240 <sup>b</sup>                                        | n.m.                              | 15.3                     | –               | n.m.                   | n.m.   | n.m.  | –                                         | n.m.            |                                                             |
| 12                                                      | 10                                | 97.2                     | n.d.            | 26.80                  | 11.7   | 5.23  | n.d.                                      | –               | 1.15                                                        |
|                                                         | 20                                | 80.8                     | n.d.            | 20.55                  | 7.66   | 3.27  | n.d.                                      | –               | 1.17                                                        |
|                                                         | 40                                | 65.9                     | n.d.            | 13.25                  | 4.95   | 2.59  | n.d.                                      | –               | 1.00                                                        |
|                                                         | 40                                | 65.0                     | n.d.            | –                      | n.m.   | n.m.  | n.d.                                      | –               | n.m.                                                        |
|                                                         | 50                                | 59.9                     | 87.3            | 9.01                   | n.m.   | n.m.  | 1130 <sup>a</sup>                         | 6640            | n.m.                                                        |
|                                                         | 60                                | 56.4                     | 64.7            | 6.59                   | 3.99   | 2.20  | n.m.                                      | –               | 1.00                                                        |
|                                                         | 60                                | 56.3                     | 62.5            | 6.16                   | n.m.   | n.m.  | 1090 <sup>a</sup>                         | 5930            | n.m.                                                        |
|                                                         | 70                                | 53.6                     | 43.5            | 4.18                   | n.m.   | n.m.  | 1090 <sup>a</sup>                         | 5670            | n.m.                                                        |
|                                                         | 80                                | 51.6                     | 33.5            | 3.30                   | 3.39   | 1.88  | n.m.                                      | –               | 0.96                                                        |
|                                                         | 80                                | 51.2                     | 29.4            | 2.81                   | n.m.   | n.m.  | 1060                                      | 5190            | n.m.                                                        |
|                                                         | 80                                | 51.8                     | 32.2            | 3.08                   | n.m.   | n.m.  | 1080                                      | 5400            | n.m.                                                        |
|                                                         | 100                               | 48.4                     | 20.2            | 1.90                   | 2.86   | 1.67  | n.m.                                      | –               | 0.94                                                        |
|                                                         | 100                               | 48.4                     | 17.0            | 1.66                   | n.m.   | n.m.  | 982                                       | 4500            | n.m.                                                        |
|                                                         | 120                               | 47.4                     | 15.3            | 1.49                   | 2.51   | 1.49  | n.m.                                      | –               | 0.94                                                        |

|    |     |      |      |      |      |      |                    |                   |      |
|----|-----|------|------|------|------|------|--------------------|-------------------|------|
|    | 120 | 47.9 | 9.1  | 1.02 | n.m. | n.m. | 884                | 3950              | n.m. |
|    | 160 | 46.0 | 9.3  | 1.00 | n.m. | n.m. | n.m.               | –                 | 0.99 |
| 18 | 30  | 64.2 | n.d. | 12.2 | n.m. | n.m. | n.d.               | –                 | n.m. |
|    | 40  | 55.4 | n.d. | 8.33 | n.m. | n.m. | n.d.               | –                 | n.m. |
|    | 50  | 56.8 | 66.2 | 6.56 | n.m. | n.m. | 1280 <sup>a</sup>  | 7190              | n.m. |
|    | 60  | 53.7 | 41.4 | 4.00 | n.m. | n.m. | 1090               | 5680              | n.m. |
|    | 70  | 51.9 | 26.5 | 2.60 | n.m. | n.m. | 1110               | 5540              | n.m. |
|    | 80  | 50.0 | 18.9 | 1.87 | n.m. | n.m. | 1080               | 5190              | n.m. |
|    | 90  | 49.7 | 14.6 | 1.51 | n.m. | n.m. | 1020               | 4850              | n.m. |
|    | 100 | 47.9 | 12.9 | 1.33 | n.m. | n.m. | 970                | 4390              | n.m. |
|    | 110 | 47.2 | 11.4 | 1.19 | n.m. | n.m. | 905                | 3990              | n.m. |
|    | 120 | 47.2 | 8.1  | 0.93 | n.m. | n.m. | 848                | 3710              | n.m. |
|    | 27  | 30   | 64.4 | n.d. | –    | n.m. | n.m.               | –                 | –    |
| 40 |     | 59.1 | 78.8 | 8.06 | n.m. | n.m. | 961 <sup>a,c</sup> | 5460 <sup>c</sup> | n.m. |
| 50 |     | 52.7 | 35.5 | 3.42 | n.m. | n.m. | 872 <sup>c</sup>   | 4310 <sup>c</sup> | n.m. |
| 60 |     | 51.0 | 25.7 | 2.48 | n.m. | n.m. | 826 <sup>c</sup>   | 3910 <sup>c</sup> | n.m. |
| 70 |     | 49.1 | 16.8 | 1.67 | n.m. | n.m. | 803 <sup>c</sup>   | 3630 <sup>c</sup> | n.m. |
| 80 |     | 48.1 | 11.5 | 1.22 | n.m. | n.m. | 638 <sup>c</sup>   | 2740 <sup>c</sup> | n.m. |

The data for 12% SO<sub>2</sub> was partly published earlier.<sup>22,24,35</sup>

Lignin content of the defibrated solid residues (pulp) was calculated using formula  $[Lig] = 0.165 \times Kappa + 0.63$ .<sup>35</sup>

n.d. – non-defibrated solid residues; n.m. – not measured.

<sup>a</sup> The solid residues were delignified with NaClO<sub>2</sub>

<sup>b</sup> The data provided by Mr. Neraj Najar

<sup>c</sup> Air-dried unbleached solid residues prepared at 27% SO<sub>2</sub> were stored at room temperature for 6 weeks before the viscosity measurement which could have affected the results. Other solid residues were analysed within few days.

<sup>d</sup> pH of the fresh liquors are: 3.0% SO<sub>2</sub> – 1.23; 6.0% SO<sub>2</sub> – 1.13; 12% SO<sub>2</sub> – 1.00.
